# Supplementary material
Source: publisher site journal article supplement (https://www.spandidos-publications.com/2864/downloadSupplementary)

Figure S1. Relative expression of miR-1287-5p and TEAD1 mRNA following transfection in HCCLM3 and Huh7 cells. (A) miR-1287-5p expression was assessed by RT-qPCR following transfection in HCCLM3 and Huh7 cells. (B) TEAD1 mRNA was assessed by RT-qPCR following transfection in HCCLM3 and Huh7 cells. \*\*P<0.01 vs. sh-NC/Vector.

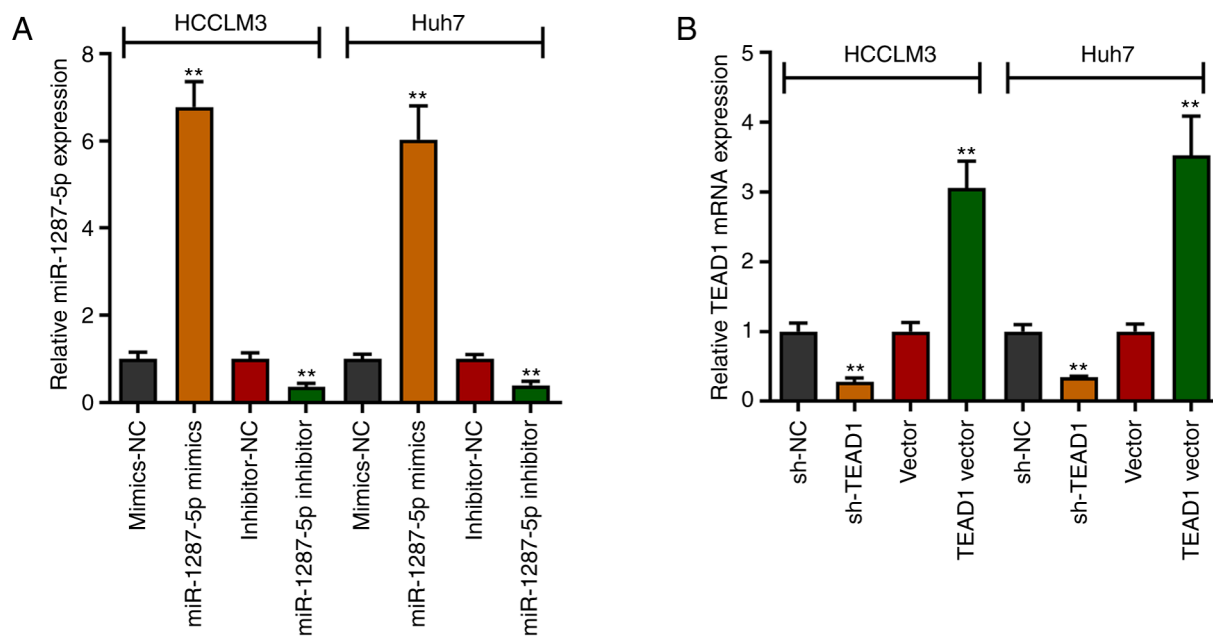

Supplement: Supplementary file 1 [file downloadSupplementary]
